# Supplementary material for: Opportunities and Alternatives of Modern Radiation Oncology and Surgery for the Management of Resectable Brain Metastases
Source: MDPI journal article supplement (doi:10.3390/cancers15143670), 2023-07-19
Supplement: s1 [file s1]

**Supplementary Table S1.** Retrospective data on re-irradiation of resected brain metastases after whole brain radiation therapy.

| Author                | Pat. | Met.          | Marginal<br>SRS dose | Median<br>PTV      | Median<br>interval<br>from WBRT | Median<br>OS<br>after Re RT | Median interval<br>to progression<br>after Re RT | 1-year<br>LC | Prognostic factors                                                | Severe toxicity                      |
|-----------------------|------|---------------|----------------------|--------------------|---------------------------------|-----------------------------|--------------------------------------------------|--------------|-------------------------------------------------------------------|--------------------------------------|
|                       | (n)  | (n)           | (Gy)                 | (cm <sup>3</sup> ) | (months)                        | (months)                    | (months)                                         | (%)          |                                                                   |                                      |
| Caballero, 2012 [197] | 310  | 3<br>(median) | 17-18.5              | 5.8                | 8.1                             | 8.4                         | NR                                               | NR           | differ from primary tumor                                         | NR                                   |
| Chao, 2008 [198]      | 111  | NR            | RTOG 90-05 protocol  | NR                 | NR                              | 9.9                         | 5.2                                              | NR           | Max dose < 22Gy and tumor > 2cm were predictive for local failure | RN: 2 pat.                           |
| Huang, 2013 [199]     | 56   | 4<br>(median) | 17                   | NR                 | 10.5                            | 10.8                        | 6.5                                              | NR           | high KPS + control of systemic tumor                              | NR                                   |
| Maranzano, 2012 [200] | 69   | NR            | 20                   | NR                 | 11                              | 10                          | NR                                               | 74 ± 4       | KPS, neuro functional tests                                       | 6% RN (asympt.)                      |
| Noel, 2001 [201]      | 54   | NR            | 14.4 (median)        | NR                 | 9                               | NR                          | NR                                               | 91.3         | RPA class, SIR Score, interval from WBRT                          | Headache: 2 pat.<br>alopecia: 2 pat. |
| Olson, 2012 [202]     | 27   | NR            | 15-24                | 2.7                | 8                               | 3                           | 3.5                                              | 76.5         | none                                                              | NR                                   |
| Yomo, 2013 [203]      | 77   | NR            | 20                   | 8.1                | 10.6                            | 8.2                         | NR                                               | 76.6         | KPS + systemic tumor control, primary tumor, PTV size             | NR                                   |

**Abbreviations:** Pat.: patients, Met.: metastases, SRS: stereotactic radiosurgery, WBRT: whole brain radiation therapy, OS: overall survival, RT: radiotherapy, LC: local control, NR: not reported, RTOG: radiation therapy oncology group, RN: radiation necrosis, KPS: Karnofsky performance status, RPA: recursive partitioning analysis, SIR: standardized infection ratio, PTV: planned target volume

**Supplementary Table S2.** Retrospective data on re-irradiation of resected brain metastases after focal radiotherapy.

| Author                   | Pat. | Met. | Median Dose<br>of 1 <sup>st</sup> SRS<br>(Gy) | Median PTV<br>of 1 <sup>st</sup> SRS<br>(cm <sup>3</sup> ) | Median Dose<br>of 2 <sup>nd</sup> SRS<br>(Gy) | Median PTV<br>of 2 <sup>nd</sup> SRS<br>(cm <sup>3</sup> ) | Median interval<br>1 <sup>st</sup> -2 <sup>nd</sup> SRS<br>(months) | Median OS<br>after Re SRS<br>(months) | 1-year OS<br>(%) | 1-year PFS after<br>Re RT<br>(%) | 1-year LC<br>(%) | Prognostic factors                                                                                        | Severe toxicity                                |
|--------------------------|------|------|-----------------------------------------------|------------------------------------------------------------|-----------------------------------------------|------------------------------------------------------------|---------------------------------------------------------------------|---------------------------------------|------------------|----------------------------------|------------------|-----------------------------------------------------------------------------------------------------------|------------------------------------------------|
| Balermipas, 2018 [204]   | 31   | 32   | 18                                            | 2                                                          | 19                                            | 2.5                                                        | 16.5                                                                | NR                                    | 61.7             | 38.7                             | 79.5             | none                                                                                                      | 16.1% RN,<br>12.9% grade 3 tox                 |
| Holt, 2015 [205]         | 13   | 15   | 21                                            | 4.3                                                        | 21<br>in 3 fx                                 | 9.4                                                        | 6.4                                                                 | 9                                     | 43.1             | 40.4                             | 75               | none                                                                                                      | 13% RN (sympt)                                 |
| Iorio-Morin, 2019 [206]  | 56   | 75   | 20                                            | 0.86                                                       | 18                                            | 1.19                                                       | 11                                                                  | 14                                    | 56.1             | NR                               | 68               | none                                                                                                      | 5% RN<br>8.3% edema                            |
| Jayachandran, 2014 [207] | 19   | 27   | 22                                            | 1.29                                                       | 17.3                                          | 6.6                                                        | NR                                                                  | 26                                    | NR               | NR                               | 75               | none                                                                                                      | 21% RN                                         |
| Kim, 2013 [208]          | 32   | 71   | NR                                            | NR                                                         | 17                                            | NR                                                         | 6.4                                                                 | 7.9                                   | NR               | NR                               | 77<br>(6 months) | none                                                                                                      | 3 RN (sympt)                                   |
| Koffer, 2017 [209]       | 22   | 24   | 18                                            | 2.25                                                       | 15.5                                          | 3.3                                                        | 13.4                                                                | 8.78                                  | 37.5             | NR                               | 61               | PTV >4cm <sup>3</sup> =><br>reduced LC                                                                    | 16.7% RN                                       |
| Kowalchuk, 2022 [210]    | 102  | 123  | NR                                            | NR                                                         | 18                                            | NR                                                         | 12                                                                  | NR                                    | NR               | NR                               | 79               | V12 >9 cm <sup>2</sup> +<br>Dmax > 40Gy =><br>sympt. RN                                                   | 20% RN<br>(7% sympt)                           |
| Terakedis, 2014 [211]    | 37   | 43   | 18                                            | NR                                                         | 18                                            | NR                                                         | 9                                                                   | 8.3                                   | NR               | NR                               | 80.6             | none                                                                                                      | 16% RN                                         |
| Rana, 2017 [1212]        | 28   | 32   | 24                                            | 0.48<br>(GTV)                                              | 26.5                                          | 1.35 (GTV)                                                 | 9.7                                                                 | 22                                    | 90               | NR                               | 88               | none                                                                                                      | 18% RN (sympt)                                 |
| McKay, 2017 [213]        | 32   | 46   | 20                                            | 1.28                                                       | 20                                            | 0.98                                                       | 19                                                                  | N R                                   | 70               | NR                               | 79               | cum. V40 predict. f.<br>RN (0,28cm <sup>3</sup> 10%<br>0,76cm <sup>3</sup> 20% 1,6cm <sup>3</sup><br>50%) | 30% RN<br>24% RN (sympt)                       |
| Minniti, 2016 [214]      | 43   | 47   | NR                                            | NR                                                         | 21-24<br>in 3 fx                              | 16.4                                                       | 17                                                                  | 10                                    | 37               | NR                               | 70               | KPS+ controlled<br>systemic disease                                                                       | 19% RN (radiol)                                |
| Moreau, 2018 [215]       | 30   | 36   | NR                                            | 1.48                                                       | 18                                            | 4.8                                                        | >10                                                                 | 14,2                                  | 65               | NR                               | 67.8             | PTV> 3cm <sup>3</sup> =><br>worse LC PTV><br>7cm <sup>3</sup> => increased<br>tox.                        | 10% RN (radiol),<br>13% bleeding,<br>10% edema |

**Abbreviations:** Pat.: patients, Met.: metastases, SRS: stereotactic radiosurgery, PTV: planned target volume, OS: overall survival, PFS: progression-free survival, RT: radiotherapy, LC: local control, NR: not reported, RN: radiation necrosis, tox.: toxicity, fx: fractions, V12: brain volume receiving 12 Gy, Dmax: maximal dose, GTV: gross tumor volume, cum. V40: cumulative brain volume receiving 40 Gy, KPS: Karnofsky performance status
